# Supplementary material for: Primary Care Utilization and Cardiovascular Screening in Adult Survivors of Childhood Cancer
Source: PubMed Central journal article supplement (PMC10719759; doi:10.1001/jamanetworkopen.2023.47449), 2023-12-13
Supplement: jamanetwopen-e2347449-s001.pdf [file jamanetwopen-e2347449-s001.pdf]

## Data Sharing Statement

Ohlsen. Primary Care Utilization and Cardiovascular Screening in Adult Survivors of Childhood Cancer. *JAMA Netw Open*. Published December 13, 2023.  
doi:10.1001/jamanetworkopen.2023.47449

### Data

**Data available:** No
